# Supplementary material
Source: Springer Nature journal article supplement (https://www.springermedizin.de/resource/supplementary/12943_2014_1377_MOESM4_ESM.pdf/9552840)

**A**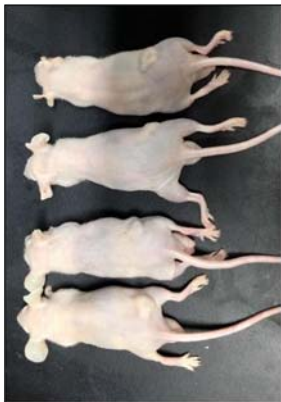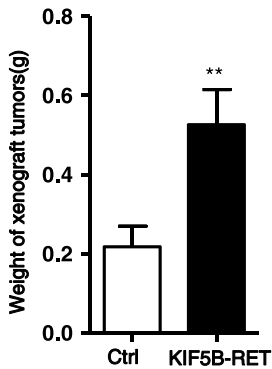**B**

Xenograft tumors of A549 cell in nude mice

Control  
KIF5B-RET

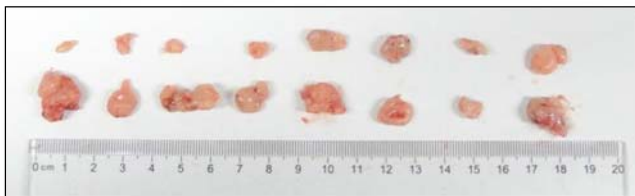

Supplement: MOESM4 [file 9552840]
